# Supplementary material for: Is There a Relevant Clinical Impact in Differentiating Idiopathic versus Unexplained Male Infertility?
Source: PubMed Central journal article supplement — World J Mens Health. 2022 Sep 2;41(2):354–62. doi: 10.5534/wjmh.220069 (PMC10042653; doi:10.5534/wjmh.220069), 2022-09-02
Supplement: wjmh-41-354-s001.pdf [file wjmh-41-354-s001.pdf]

**Supplement Table.** Logistic regression models predicting unexplained infertility in the infertile cohort

| Variable                 | Univariable model |         | Multivariable model |         |
|--------------------------|-------------------|---------|---------------------|---------|
|                          | OR (95% CI)       | p-value | OR (95% CI)         | p-value |
| Age                      | 0.98 (0.95–1.02)  | 0.21    | 1.08 (0.96–1.21)    | 0.16    |
| BMI                      | 0.97 (0.90–1.05)  | 0.51    | 0.74 (0.51–1.07)    | 0.11    |
| CCI                      | 1.01 (0.80–1.65)  | 0.45    |                     |         |
| FSH                      | 0.92 (0.84–1.01)  | 0.07    |                     |         |
| Total testosterone       | 1.02 (0.86–1.19)  | 0.84    | 0.96 (0.65–1.41)    | 0.83    |
| Testicular volume <15 mL | 0.55 (0.35–0.86)  | <0.01   | 0.85 (0.76–1.98)    | 0.38    |
| Vitamin D <20 ng/mL      | 0.15 (0.10–0.76)  | 0.03    | 0.11 (0.01–0.75)    | 0.03    |

OR: odds ratio, CI: confidence interval, BMI: body mass index, CCI: Charlson Comorbidity Index, FSH: follicle-stimulating hormone.
